# Supplementary material
Source: Springer Nature journal article supplement (https://www.springermedizin.de/resource/supplementary/13014_2011_607_MOESM1_ESM.pdf/9634140)

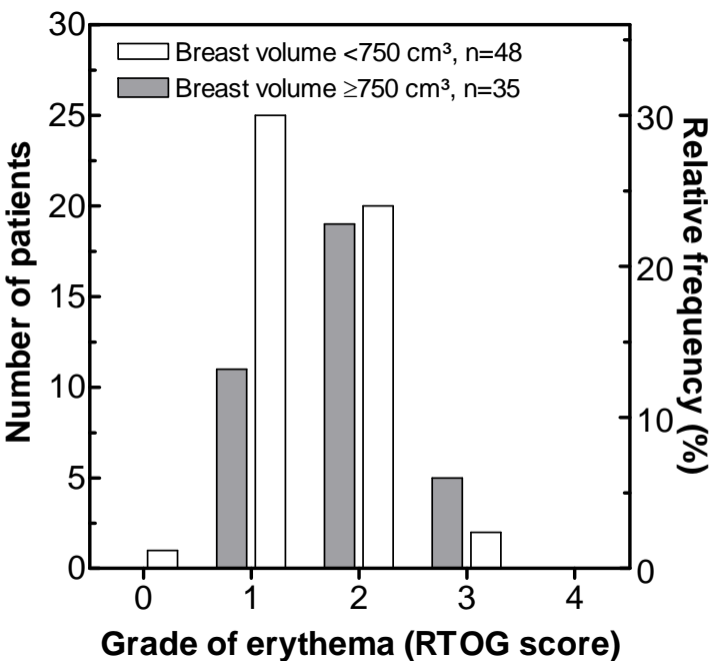

Supplement: MOESM1 [file 9634140]
